# Supplementary material
Source: PubMed Central journal article supplement (PMC4961600)
Supplement: NIHMS767096-supplement-Figure_Legend.pdf [file NIHMS767096-supplement-Figure_Legend.pdf]

## Supplemental Data:

### **A Novel Alkylating Agent Melflufen Induces Irreversible DNA Damage and Cytotoxicity in Multiple Myeloma Cells**

Arghya Ray<sup>1</sup>, Deepika Sharma Das<sup>1</sup>, Yan Song<sup>1</sup>, Eva Nordström<sup>2</sup>, Joachim Gullbo<sup>3</sup>, Paul G. Richardson<sup>1</sup>, Dharminder Chauhan<sup>1\*#</sup> and Kenneth C. Anderson<sup>1\*#</sup>

<sup>1</sup>The LeBow Institute for Myeloma Therapeutics and Jerome Lipper Myeloma Center, Department of Medical Oncology, Dana-Farber Cancer Institute, Harvard Medical School, Boston, MA, <sup>2</sup>Oncopeptides AB, Karolinska Institutet Science Park, Solna, Sweden, <sup>3</sup> Department of Immunology, Genetics and Pathology, Section of Oncology, Uppsala University, 751 85 Uppsala, Sweden.

Running title: Alkylating drug melflufen as myeloma therapy

Grant Support: This investigation was supported by National Institutes of Health Specialized Programs of Research Excellence (SPORE) grant P50100707, PO1-CA078378, and RO1 CA050947 (DC, and KCA); KCA is an American Cancer Society Clinical Research Professor.

Conflicts of Interest disclosure: EN is an employee of Oncopeptides, AB. JG is equity owner in Oncopeptides AB. DC is a consultant to Oncopeptides AB. Other co-authors have no competing financial interests.

\* Correspondence: Kenneth C. Anderson, M.D., Dharminder Chauhan, Ph.D. Dana-Farber Cancer Institute, M561, 450 Brookline Ave, Boston, MA; Dharminder Chauhan, Ph.D., Dana-Farber Cancer Institute, M561, 450 Brookline Ave, Boston, MA 02215; Dharminder\_Chouhan@dfci.harvard.edu

# DC and KCA are Joint Senior authors;

#DC: Ph: 617-632-4563; KCA: Ph: 617-632-2144; Fax#: 617.632.2140

Keywords: Myeloma, Apoptosis, Novel therapeutics, alkylating agents, melflufen, melphalan; Abstract: 200; Text count: 3564; Total number of Figures 7.

Category: Full Paper/ Original Articles

**Authors' contributions:** AR designed research, performed the experiments, analyzed data, and wrote the manuscript; DSD and YS contributed in Western blot analysis and flow cytometry; JC synthesized melflufen; PGR provided clinical samples; DC designed research, analyzed data, and wrote the manuscript; and KCA analyzed data and wrote the manuscript.

## Supplementary Figure Legends:

**Figure S1: Flow analysis of the induction of  $\gamma$ -H2AX in different primary cells.** MM tumor cells were isolated from the bone marrow of relapsed/refractory patients (n=3), and cells were treated with melflufen (5  $\mu$ M) or melphalan (10  $\mu$ M) for 1h, washed with PBS to remove drugs, fixed and stained with Alexa Fluor 647 conjugated anti-H2AX (pS139) Ab followed by FACS analysis. Bar Graph: Quantification of  $\gamma$ -H2AX populations on MM tumor cells (mean  $\pm$  SD; p< 0.05; n=3).

Total MNCs were isolated from the peripheral blood samples of normal healthy donors (3 normal PBMC samples). Cells were treated with melflufen or melphalan (10  $\mu$ M) for 1h, washed with PBS to remove drugs, fixed and stained with Alexa Fluor 647 conjugated anti-H2AX (pS139) Ab followed by FACS analysis. Melflufen/Melphalan-treated normal MNCs were also analyzed for the induction of  $\gamma$ -H2AX on T or B cells. For this, the cells were subjected to 2-color staining; either CD3-FITC plus  $\gamma$ -H2AX-Alexa-647 (pan T cells), or CD20-FITC plus  $\gamma$ -H2AX-Alexa-647 (B cells). The FITC-expressing cells were first gated out based respective forward versus side scatter plots. The FITC-expressing populations were further analyzed for the induction of  $\gamma$ -H2AX based on signals in Alexa-Fluor-647/APC channel. Bar Graph: Quantification of  $\gamma$ -H2AX populations on total MNCs, CD3-T or CD20-B cells (mean  $\pm$  SD; p< 0.05; n=3, each sample measured in quadruplicate).

---

**Figure S2: Comparison of melflufen and melphalan-induced apoptosis in CD138+ve MM tumor cells isolated from the BM of relapsed/refractory patients:** Tumor cells were treated with melflufen (5  $\mu$ M) or melphalan (10  $\mu$ M) for 1h, washed with PBS to remove the drug, followed by culture in the absence of inhibitor and presence of recombinant human IL-6 (5 ng/ml) in (10%FCS + RPMI1640) medium. Cells were harvested after 48h and 72h and subjected to flow analysis for viable versus nonviable cells. Bar Graph: Quantification of dead cells in melflufen- and melphalan-treated populations (mean  $\pm$  SD;  $p < 0.05$ ;  $n=3$ ).

---

---
